# Supplementary material
Source: publisher figshare collection journal article supplement (https://geolsoc.figshare.com/ndownloader/files/28562486)
Supplement: Supplementary file 1 [file 28562486]

## Sheet: Hoja1
ID	ID	##-G	DATE	TIME	line/#	(KIS)	±	(KIS)	±	(VPDB)	(VPDB)	Max P		ID	wt.% TOC
CM-208	H10	40-G81	2012-12-05	10:00:50	23/2	3.592	0.01	3.98	0.02	-0.114568	-0.41115	392		CM206	1,0±0,1
CM-210	H9	39-G81	2012-12-05	09:35:56	23/1	4.318	0.011	3.55	0.027	0.606936	-0.84276	451		CM208	0,4±0,1
CM-215	H8	38-G81	2012-12-05	09:10:48	22/2	5.082	0.005	2.88	0.027	1.3662	-1.51527	271		CM210	1,6±0,2
CM-216	H7	37-G81	2012-12-05	08:44:02	22/1	4.49	0.012	2.109	0.017	0.777871	-2.28916	372		CM213	1,0±0,1
CM-219	H6	36-G81	2012-12-15	01:30:14	11/2	3.678	0.005	3.575	0.028	-0.10895	-0.998849	1229		CM215	0,9±0,1
CM-222	H5	35-G81	2012-12-05	07:54:32	21/1	5.371	0.015	3.661	0.034	1.65341	-0.731345	1078		CM219	0,9±0,1
CM-223S	H4	34-G81	2012-12-05	07:14:30	20/2	4.493	0.01	3.108	0.031	0.780852	-1.28642	517		CM223	1,6±0,2
CM-226R	H3	33-G81	2012-12-05	06:38:25	20/1	5.666	0.01	3.629	0.027	1.94659	-0.763465	241		CM227	1,3±0,1
CM-228	H2	32-G81	2012-12-05	06:13:30	19/2	6.792	0.012	3.907	0.03	3.06561	-0.484424	583		CM233	1,1±0,1
CM-229R	H1	31-G81	2012-12-15	00:53:25	11/1	4.649	0.008	3.914	0.023	0.846763	-0.661373	1412		CM235s	0,9±0,1
CM-232	G10	30-G81	2012-12-05	05:10:41	18/2	4.51	0.006	3.419	0.025	0.797747	-0.974251	365		CM235I	0,6±0,1
CM-233R	G9	29-G81	2012-12-05	04:45:45	18/1	5.606	0.017	3.148	0.014	1.88696	-1.24627	784		CM237	1,4±0,1
CM-235i	G7	27-G81	2012-12-05	03:40:27	17/1	6.701	0.014	3.91	0.031	2.97518	-0.481412	570		CM239	1,0±0,1
CM-235M	G6	26-G81	2012-12-05	03:02:38	16/2	6.024	0.013	3.346	0.036	2.30237	-1.04752	585		CM243	0,8±0,1
CM-235R	G8	28-G81	2012-12-05	04:18:54	17/2	6.856	0.021	3.2	0.036	3.12922	-1.19407	1042		CM245	<0,6
CM-237R	G5 sample appears to have a small hair in it	25-G81	2012-12-15	00:07:05	10/2	7.183	0.022	1.706	0.026	3.34087	-2.85945	1434		CM247	1,3±0,1
CM-238.1	G4	24-G81	2012-12-05	02:00:53	15/2	5.478	0.012	0.996	0.018	1.75975	-3.40632	810		CM251	1,3±0,1
CM-241R	G3	23-G81	2012-12-05	01:33:42	15/1	5.243	0.014	1.968	0.016	1.52621	-2.43068	530		CM253	<0,5
CM-243	G2	22-G81	2012-12-05	01:07:27	14/2	8.197	0.015	2.188	0.031	4.46191	-2.20986	440		CM257	1,7±0,4
CM-247S	G1	21-G81	2012-12-14	23:28:24	10/1	5.053	0.011	1.65	0.016	1.2444	-2.9152	1358		CM259	<0,6
CM-251R	F10	20-G81	2012-12-14	22:51:53	9/2	6.069	0.009	2.871	0.018	2.24441	-1.69969	1383		CM263	1,0±0,1
CM-257R	F9	19-G81	2012-12-04	22:58:55	12/1	4.852	0.011	1.177	0.032	1.13763	-3.22465	293		CM265	<0,5
CM-263R	F3	13-G81	2012-12-04	20:15:44	9/1	4.423	0.013	2.862	0.018	0.711286	-1.53334	409		CM267	0,7±0,1
CM-263S	F8	18-G81	2012-12-04	22:34:20	11/2	4.87	0.015	2.427	0.027	1.15552	-1.96997	279		CM271	0,8±0,1
CM-269R	F4	14-G81	2012-12-04	20:41:03	9/2	5.531	0.023	2.069	0.029	1.81242	-2.32931	156		CM273	1,0±0,1
CM-271	F5	15-G81	2012-12-04	21:17:18	10/1	5.967	0.013	2.315	0.031	2.24572	-2.08238	529		CM275	0,8±0,1
CM-274	F6	16-G81	2012-12-04	21:42:26	10/2	4.583	0.019	1.413	0.012	0.870295	-2.98776	317
CM-279	F7	17-G81	2012-12-04	22:08:55	11/1	4.606	0.019	1.938	0.021	0.893152	-2.4608	414
